# Supplementary material for: Serial Gene Losses and Foreign DNA Underlie Size and Sequence Variation in the Plastid Genomes of Diatoms
Source: PubMed Central journal article supplement — Genome Biol Evol. 2014 Feb 23;6(3):644–54. doi: 10.1093/gbe/evu039 (PMC3971590; doi:10.1093/gbe/evu039), 2014-02-23
Supplement: supp_evu039_FigS1.pdf [file supp_evu039_FigS1.pdf]

*ser*

orf218

orf503

orf388

orf178

Cylindrotheca closterium pCc1  
4,945 bps

*ser*

orf218

orf482

orf311

orf111

Cylindrotheca fusiformis pCf1  
4,273 bps

*ser*

orf217

orf484

orf248

orf125

Cylindrotheca fusiformis pCf2  
4,079 bps
